# Supplementary material
Source: HighWire-hosted journal article supplement (doi:10.1101/rna.043943.113)
Supplement: SuppFigs.docx [file SuppFigs.docx]

Supplemental 1


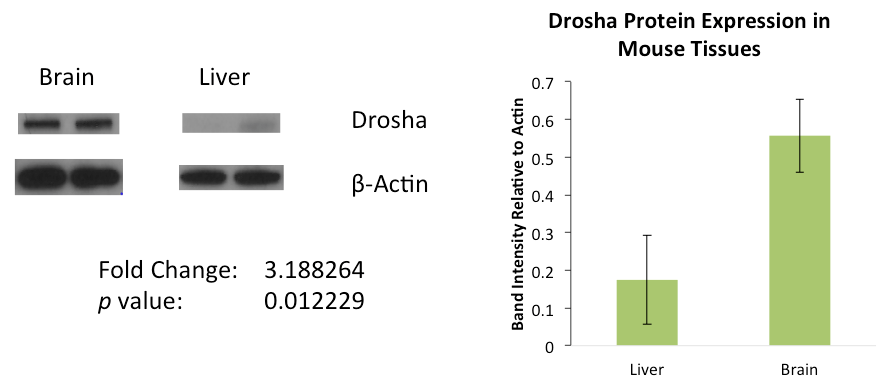


Supplemental 2

Supplemental 3

Supplemental 4


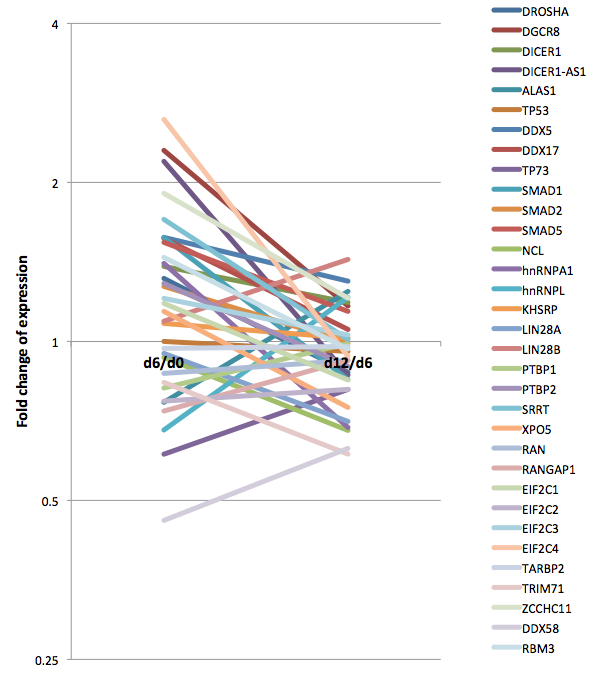


Supplemental 5

Supplemental 6

A

**
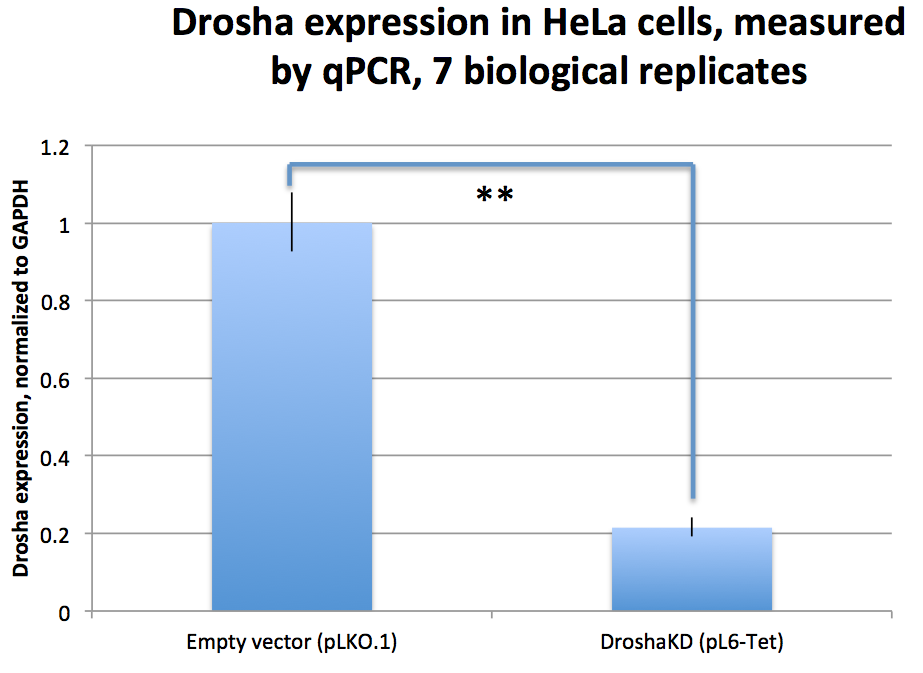
**

B


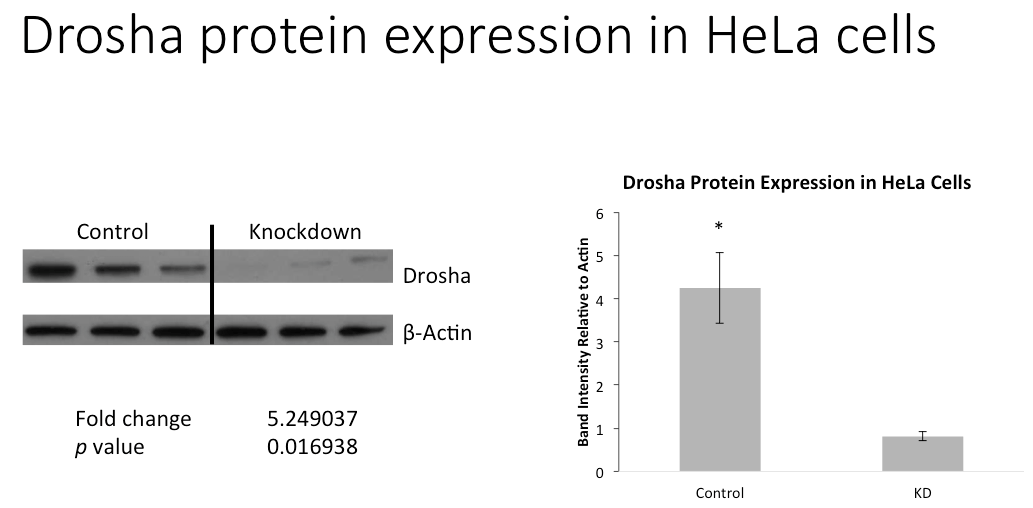


Supplemental 7

**
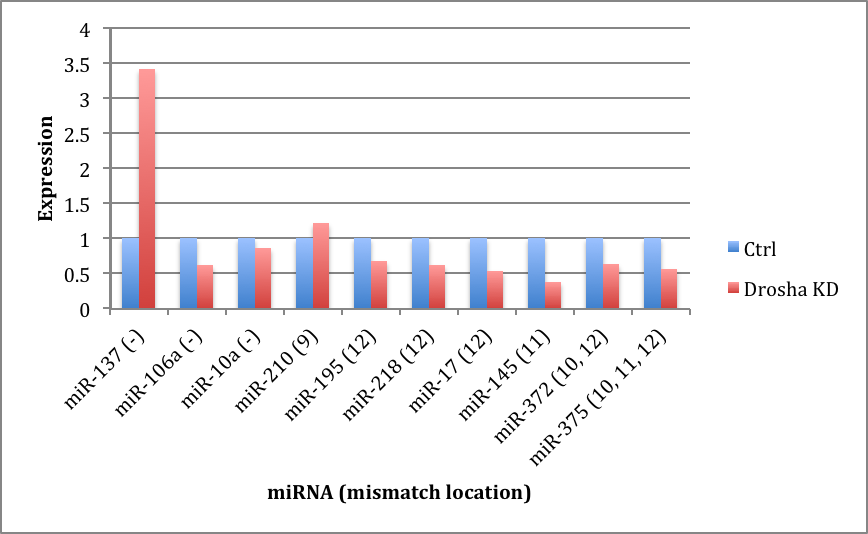
**

Supplemental 8
