# Supplementary material
Source: HighWire-hosted journal article supplement (doi:10.1101/rna.043943.113)
Supplement: SuppLegends.docx [file SuppLegends.docx]

**Supplemental Legends:**

**Supplemental Figure 1: Counting of mismatches in miRNAs in H1 cells with DicerKD and control cells.** Mismatches summed for positions counted from the Drosha cutting site for a set of 202 miRNAs split in two equal groups based on fold change (median=0.395) in the Dicer knockdown

**Supplemental Figure 2: Drosha protein expression levels in mouse brain and liver.** Protein levels of Drosha and β-actin measured by western blots (A). Quantification of Protein levels using triplicates extrapolated from different gels. Fold change = 3.2, p<0.05 (B).

**Supplemental Figure 3: Control mismatch counts for mouse brain and liver.** Average expression of miRNAs with different numbers of mismatches in the 1-21 region in mouse liver and brain ([Takada et al. 2006](#_ENREF_48))

**Supplemental Figure 4: Control mismatch ratios in T-cells.** Ratio (CD4SP/DN3) of average expression for each miRNA group based on number of mismatches in the 5, 9-12 region.

**Supplemental Figure 5: Fold change of miRNA machinery genes in neuronal development**. Fold changes for day6 vs. day0, and day12 vs. day6 for a set of genes involved with miRNA biogenesis, based on RNAseq data.

**Supplemental Figure 6: Control mismatch counts during neuronal differentiation.** Number of mismatches outside the 5, 9-12 region in miRNAs with high and low fold change (multiArray) in neuronal differentiation through days 0-6 and 6-12.

**Supplemental Figure 7: DroshaKD in HeLa cells, verification of expression levels.** Drosha levels measured by qPCR and normalized to GAPDH. 7 biological replicates showed an average 9-fold knock down (log p <-5) (A). Drosha protein expression levels measured by western blotting, normalized to β-actin. 3 biological replicates showed an average 5-fold knockdown (p<0.05) (B)

**Supplemental Figure 8: Endogenous miRNA levels in DroshaKD and control cells.** Endogenous levels for a random selection of miRNAs were measured by TaqMan qPCR, normalized to RNU66. The miRNAs are sorted right to left by increasing number of mismatches in region 9-12 nucleotides from the Drosha cutting site.

**Supplemental Table 1:** The genes of interest are listed by rows with normalized mean TPM (transcript per million) values reported in the table. Across columns are the time points of in vitro cortical neural induction, from day 0 to day 12 incremented by three days.
